# Supplementary material
Source: publisher figshare collection journal article supplement (https://brill.figshare.com/ndownloader/files/30610998)
Supplement: Supplementary file 1 [file 30610998]

**Appendix A**

**Ad hoc instruments**

**A1. Sociodemographic survey**

| **EXTERNADO UNIVERSITY OF COLOMBIA** | | | | | | | | | |
| --- | --- | --- | --- | --- | --- | --- | --- | --- | --- |
| **FACULTY OF SOCIAL AND HUMAN SCIENCES** | | | | | | | | | |
| **RESEARCH CENTER ON SOCIAL DYNAMICS (RCSD) - AREA OF HEALTH AND SOCIETY** | | | | | | | | | |
| *Study of Complex Trauma / Developmental Trauma Disorder (DTD) in children and adolescents of Bogota, Colombia.* | | | | | | | | | |
| **SOCIODEMOGRAPHIC SURVEY** | | | | | | | | | |
|  |
| **Mark with an X and fill in the blank spaces as appropriate.** | | | | | | | | | |  |
|  |  |  |  |  |  |  |  |  |  |  |
| **Subject number:** | | **Group:** | DTD.P | DTD.C | CG |  | **Date:** |  | |  |
|  |  |  |  |  |  |  |  |  |  |  |
| 1. Sex | Male | Female |  | 2. Age | |  | |  |  |  |
|  |  |  |  |  |  |  |  |  |  |  |
| 3. Current school grade: | | | | |  | | |  |  |  |
|  |  |  |  |  |  |  |  |  |  |  |
| 4. Does the child/adolescent belong to any of this ethnic groups? | | | | | | |  |  |  |  |
|  |  |  |  |  |  |  |  |  |  |  |
| a. Indigenous people | |  | b. Afrocolombian | |  | c. Raizal |  | d. Rom (gypsy) | |  |
|  |  |  |  |  |  |  |  |  |  |  |
| e. None | | |  |  |  |  |  |  |  |  |
|  |  |  |  |  |  |  |  |  |  |  |
| 5. Origin of the child/adolescent | | | a. Rural |  | b. Urban |  |  |  |  |  |
|  |  |  |  |  |  |  |  |  |  |  |
| 6. Socioeconomic Status (SES) of family of origin: | | | | |  | |  |  |  |  |
|  |  |  |  |  |  |  |  |  |  |  |
| 7. Reason for admission to the institution (if the child/adolescent is CG, go to question 9) | | | | | | | |  |  |  |
|  |  |  |  |  |  |  |  |  |  |  |
| a. Neglect | |  | b. Physical or psychological maltreatment | | | |  | c. Sexual abuse | |  |
|  |  |  |  |  |  |  |  |  |  |  |
| d. Abandonment | |  |  |  |  |  |  |  |  |  |
|  |  |  |  |  |  |  |  |  |  |  |
| 8. Briefly describe reason for admission of child/adolescent to the institution: | | | | | | | | | |  |
|  |
|  |
|  |
| **Below you will find some questions about the health history and current health of the child. Mark with an X in YES, NO or DON'T KNOW (DK).** | | | | | | | | | |  |
|  |
|  |
|  |  |  |  |  |  |  |  |  |  |  |
| 9. Did the child/adolescent have premature birth? | | | | | YES |  | NO |  | DK |  |
|  |  |  |  |  |  |  |  |  |  |  |
| 10. Did the child/adolescent have a history of difficulties in childbirth and neonatal adaptation? (e.g., emergency caesarean surgery, instrumented delivery, required oxygen at birth, was hospitalized in an incubator, required resuscitation at birth): | | | | | | | | | |  |
|  |
|  |
|  |  |  |  |  |  |  |  |  |  |  |
|  |  |  |  |  | YES |  | NO |  | DK |  |
|  |  |  |  |  |  |  |  |  |  |  |
| 11. Did the child have hospitalisations in the first three (3) months of life? | | | | | | |  |  |  |  |
|  |  |  |  |  |  |  |  |  |  |  |
|  |  |  |  |  | YES |  | NO |  | DK |  |
|  |  |  |  |  |  |  |  |  |  |  |
| 12. Did the child/adolescent present malnutrition or risk of malnutrition reported in medical check-ups? | | | | | | | | | |  |
|  |
|  |  |  |  |  |  |  |  |  |  |  |
|  |  |  |  |  | YES |  | NO |  | DK |  |
|  |  |  |  |  |  |  |  |  |  |  |
| 13. Did the child/adolescent show delay in psychomotor development reported in medical check-ups? | | | | | | | | | |  |
|  |  |  |  |  |  |  |  |  |  |  |
|  |  |  |  |  | YES |  | NO |  | DK |  |
|  |  |  |  |  |  |  |  |  |  |  |
| 14. Does the child/adolescent currently present a condition of malnutrition or risk of malnutrition? | | | | | | | | |  |  |
|  |  |  |  |  |  |  |  |  |  |  |
|  |  |  |  |  | YES |  | NO |  | DK |  |
|  |  |  |  |  |  |  |  |  |  |  |
| 15. Does the child currently have a delay in psychomotor development? | | | | | | |  |  |  |  |
|  |  |  |  |  |  |  |  |  |  |  |
|  |  |  |  |  | YES |  | NO |  | DK |  |
|  |  |  |  |  |  |  |  |  |  |  |
| 16. Does the child currently present recurrent infections? (e.g., respiratory diseases, diarrhoea, urinary infections). | | | | | | | | | |  |
|  |
|  |  |  |  |  |  |  |  |  |  |  |
|  |  |  |  |  | YES |  | NO |  | DK |  |
|  |  |  |  |  |  |  |  |  |  |  |
| 17. Does the child show signs of allergy? (e.g., allergic rhinitis, asthma, atopic dermatitis). | | | | | | | | |  |  |
|  |  |  |  |  |  |  |  |  |  |  |
|  |  |  |  |  | YES |  | NO |  | DK |  |
|  |  |  |  |  |  |  |  |  |  |  |
| 18. Is the child currently under psychiatric drug treatment? | | | | | | |  |  |  |  |
|  |  |  |  |  | YES |  | NO |  | DK |  |
| Write the name of the psychiatric drugs*: | | | | | | | | | |  |
|  |
| **Below you will find some questions about the history of institutionalization of the child/adolescent. Fill in the blank spaces as appropriate (if the child/adolescent is from the CG, do not answer this section)** | | | | | | | | | |  |
|  |
|  |
|  |  |  |  |  |  |  |  |  |  |  |
| 19. Age of the child/adolescent at the time of being removed from the home for the first time (Institution / Foster Home): | | | | | | |  |  |  |  |
|  |  | |  |
|  |  |  |  |  |  |  |  |  |  |  |
| 20. Total duration in months of having been removed from the home to date (Sum of time in institutions and foster homes): | | | | | | |  |  |  |  |
|  |  | |  |
|  |  |  |  |  |  |  |  |  |  |  |
| 21. Total duration in months that the child/Adolescent has been institutionalized to date (Sum of time in institutions only): | | | | | | |  |  |  |  |
|  |  | |  |
|  |  |  |  |  |  |  |  |  |  |  |
| 22. Number of institutions in which the child/adolescent was institutionalized: | | | | | | |  |  | |  |
|  |  |  |  |  |  |  |  |  |  |  |
| 23. Was the child/adolescent placed in a foster home? | | | | | YES |  | NO |  | DK |  |
|  |  |  |  |  |  |  |  |  |  |  |
| 24. Number of foster homes in which the child/adolescent was placed*: | | | | | | |  |  | |  |
|  |  |  |  |  |  |  |  |  |  |  |
| 25. Total duration in months spent by the child/adolescent in the foster home(s) (Sum of time in foster homes) *: | | | | | | |  |  |  |  |
|  |  | |  |
|  |  |  |  |  |  |  |  |  |  |  |
| 26. Has the child/adolescent had unsuccessful adoption processes? | | | | | YES |  | NO |  | DK |  |
|  |  |  |  |  |  |
| 27. Number of failed adoption processes*: | | | |  |  |  |  |  | |  |
|  |  |  |  |  |  |  |  |  |  |  |
| 28. Total duration in months of the failed adoption processes*: | | | | | |  |  |  | |  |
| * If not applicable, write NA | | |  |  |  |  |  |  |  |  |
|  |  |  |  |  |  |  |  |  |  |  |

**A2. Complex Trauma Checklist for Children and Adolescents (CTCL-CA)**

| **EXTERNADO UNIVERSITY OF COLOMBIA** | | | | | | | | | | | | |
| --- | --- | --- | --- | --- | --- | --- | --- | --- | --- | --- | --- | --- |
| **FACULTY OF SOCIAL AND HUMAN SCIENCES** | | | | | | | | | | | | |
| **RESEARCH CENTER ON SOCIAL DYNAMICS (RCSD) - AREA OF HEALTH AND SOCIETY** | | | | | | | | | | | | |
| *Study of Complex Trauma / Developmental Trauma Disorder (DTD) in children and adolescents of Bogota, Colombia.* | | | | | | | | | | | | |
|  |
| **COMPLEX TRAUMA CHECKLIST FOR CHILDREN AND ADOLESCENTS (CTCL-CA)** | | | | | | | | | | | | |  |
|  |
|  |
| **Mark with an X and fill in the blank spaces as appropriate.** | | | | | | | | | | | | |  |
|  |  |  |  |  |  |  |  |  |  |  |  |  |  |
| **Subject number:** | | **Group:** | DTD.P | DTD.C | CG |  | **Date:** |  |  | | | |  |
| **A. Exposition** | | | | | | | | | | | | |  |
| Has (child/adolescent's name) ever been exposed multiple times or chronically to one or more of the following types of adverse interpersonal trauma during development? | | | | | | | | | | | | |  |
|  |
|  |  |  |  |  |  |  |  |  |  |  |  |  |  |
| 1. Abandonment by one or more of their caregiving figures. | | | | | | | | |  | YES |  | NO |  |
|  |  |  |  |  |  |  |  |  |  |  |  |  |  |
| 2. Physical aggression by one or more of their caregiving figures. | | | | | | | | |  | YES |  | NO |  |
|  |  |  |  |  |  |  |  |  |  |  |  |  |  |
| 3. Sexual assault or sexual abuse by one or more of their caregiving figures. | | | | | | | | |  | YES |  | NO |  |
|  |  |  |  |  |  |  |  |  |  |  |  |  |  |
| 4. Emotional and psychological abuse by one or more of their caregiving figures. | | | | | | | | |  | YES |  | NO |  |
|  |  |  |  |  |
| 5. Coercive parenting practices by one or more of their caregiving figures (e.g., threats to their physical and psychological integrity, physical punishment, humiliation, fear, shame, etc.). | | | | | | | | |  | YES |  | NO |  |
|  |  |  |  |  |
|  | YES |  | NO |  |
|  |  |  |  |  |  |  |  |  |  |  |  |  |  |
| 6. Having witnessed physical or verbal violence between their caregiving figures or relatives. | | | | | | | | |  | YES |  | NO |  |
|  |  |  |  |  |
| 7. Having witnessed the death of one or more of their caregiving figures. | | | | | | | | |  | YES |  | NO |  |
|  |  |  |  |  |  |  |  |  |  |  |  |  |  |
| 8. Forced separation of one or more of their caregiving figures (custody problems, foster care, immigration, illness, hospitalisation, or death). | | | | | | | | |  |  |  |  |  |
|  | YES |  | NO |  |
|  |  |  |  |  |  |  |  |  |  |  |  |  |  |
| **B. Developmental domains affected** | | | | | | | | | | | | |  |
| Which of the following domains of (child/adolescent's name)'s development have been affected? | | | | | | | | | | | | |  |
|  |
|  |  |  |  |  |  |  |  |  |  |  |  |  |  |
| **Cognitive domain** | | | | | | | | |  |  |  |  |  |
|  |  |  |  |  |  |  |  |  |  |  |  |  |  |
| 9. Memory problems (low memory capacity, impaired short, medium or long term memory, etc.). | | | | | | | | |  |  |  |  |  |
|  | YES |  | NO |  |
|  |  |  |  |  |  |  |  |  |  |  |  |  |  |
| 10. Attention problems (low level of concentration, distraction, short attention spans, etc.). | | | | | | | | |  |  |  |  |  |
|  | YES |  | NO |  |
|  |  |  |  |  |  |  |  |  |  |  |  |  |  |
| 11. Executive functions (e.g., ability to plan, guide, review, monitor, and correct activities performed). | | | | | | | | |  |  |  |  |  |
|  | YES |  | NO |  |
|  |  |  |  |  |  |  |  |  |  |  |  |  |  |
| 12. Learning difficulties. | | | | | | | | |  | YES |  | NO |  |
|  |  |  |  |  |  |  |  |  |  |  |  |  |  |
| 13. Delayed oral and/or written language. | | | | | | | | |  | YES |  | NO |  |
|  |  |  |  |  |  |  |  |  |  |  |  |  |  |
| 14. Dissociative symptoms (e.g., prolonged periods of being "in the clouds", a complete loss of awareness of the present environment, etc.). | | | | | | | | |  |  |  |  |  |
|  | YES |  | NO |  |
|  |  |  |  |  |  |  |  |  |  |  |  |  |  |
| **Behavioural domain** | | |  |  |  |  |  |  |  |  |  |  |  |
|  |  |  |  |  |  |  |  |  |  |  |  |  |  |
| 15. Impulsiveness in two or more areas that are potentially self-injurious (e.g., sex, drugs, risky or “life threatening” behaviour, binge eating). | | | | | | | | |  |  |  |  |  |
|  | YES |  | NO |  |
|  |  |  |  |  |  |  |  |  |  |  |  |  |  |
| 16. Recurrent suicidal behaviour, attitude, or threats, or self-injurious or self-aggressive behaviour. | | | | | | | | |  |  |  |  |  |
|  | YES |  | NO |  |
|  |  |  |  |  |  |  |  |  |  |  |  |  |  |
| 17. Often arguments with authority figures or adults. | | | | | | | | |  | YES |  | NO |  |
|  |  |  |  |  |  |  |  |  |  |  |  |  |  |
| 18. Often actively defies or refuses to comply with request from authority figures or standards. | | | | | | | | |  |  |  |  |  |
|  | YES |  | NO |  |
|  |  |  |  |  |  |  |  |  |  |  |  |  |  |
| **Affective domain** (**Emotional dysregulation**: the range, intensity, fluctuation and/or adequacy of the emotional response are disproportionate to the situation)**.** | | | | | | | | | | | | |  |
|  |
|  |  |  |  |  |  |  |  |  |  |  |  |  |  |
| 19. Emotional instability and dysregulation due to marked mood reactivity (e.g., severe episodes of dysphoria, irritability, or anxiety that usually last a few hours and rarely more than a few days): | | | | | | | | |  |  |  |  |  |
|  |  |  |  |  |
|  | YES |  | NO |  |
|  |  |  |  |  |  |  |  |  |  |  |  |  |  |
| 20. Inappropriate and intense anger, or difficulty controlling anger and frustration (eg, frequent display of temper, constant anger, recurring physical fights). | | | | | | | | |  |  |  |  |  |
|  | YES |  | NO |  |
|  |  |  |  |  |
| 21. Depressed mood most of the day, almost every day, as evidenced by subjective information (e.g., feels sad, empty, hopeless). | | | | | | | | |  |  |  |  |  |
|  | YES |  | NO |  |
|  |  |  |  |  |
|  |  |  |  |  |  |  |  |  |  |  |  |  |  |
| **Relational domain** | |  |  |  |  |  |  |  |  |  |  |  |  |
|  |  |  |  |  |  |  |  |  |  |  |  |  |  |
| 22. Difficulties in their ability to understand self and others in terms of mental states (e.g., recognizing own emotions, needs and achievements; and properly interpreting other people, that is, recognizing emotions and intentions of others. | | | | | | | | |  |  |  |  |  |
|  | YES |  | NO |  |
|  |  |  |  |  |
|  |  |  |  |  |  |  |  |  |  |  |  |  |  |
| 23. Distrust, without sufficient basis, that others exploit them, cause them harm, or disappoint them. | | | | | | | | |  |  |  |  |  |
|  | YES |  | NO |  |
|  |  |  |  |  |  |  |  |  |  |  |  |  |  |
| 24. Often harasses, threatens, or intimidates others. | | | | | | | | |  | YES |  | NO |  |
|  |  |  |  |  |  |  |  |  |  |  |  |  |  |
| 25. Regularly socially isolated. | | | | | | | | |  | YES |  | NO |  |
|  |  |  |  |  |  |  |  |  |  |  |  |  |  |
| 26. Pattern of unstable and intense interpersonal relationships characterized by an alternation between the extremes of idealization and devaluation. | | | | | | | | |  |  |  |  |  |
|  | YES |  | NO |  |
|  |  |  |  |  |
|  |  |  |  |  |  |  |  |  |  |  |  |  |  |
| **Attachment domain** | | | | |  |  |  |  |  |  |  |  |  |
|  |  |  |  |  |  |  |  |  |  |  |  |  |  |
| 27. Desperate efforts to avoid the real or imagined helplessness by the caregiving figures (fear of abandonment) through aggressive and controlling behaviours or the inability to detach from the caregiving figures through crying and anguish (separation anxiety). | | | | | | | | |  |  |  |  |  |
|  | YES |  | NO |  |
|  |  |  |  |  |
|  |  |  |  |  |
|  |  |  |  |  |  |  |  |  |  |  |  |  |  |
| 28. Distrust towards the caregiving figures. | | | | | | | | |  | YES |  | NO |  |
|  |  |  |  |  |  |  |  |  |  |  |  |  |  |
| 29. Avoidance of contact and interaction with their caregiving figures, does not look for the caregiver in times of stress, fear, anguish, or pain. | | | | | | | | |  |  |  |  |  |
|  | YES |  | NO |  |
|  |  |  |  |  |  |  |  |  |  |  |  |  |  |
| 30. Disorganized behaviour in the presence of the caregiving figures (e.g., expression of intense fear, erratic, or incomprehensible behaviour, freezing or paralyzing, unmotivated or stereotyped repetitive behaviours, inappropriate emotional reactions, such as laughter in moments of anguish). | | | | | | | | |  |  |  |  |  |
|  |  |  |  |  |
|  |  |  |  |  |
|  | YES |  | NO |  |
|  |  |  |  |  |
|  |  |  |  |  |  |  |  |  |  |  |  |  |  |
| **Identity domain** | | |  |  |  |  |  |  |  |  |  |  |  |
|  |  |  |  |  |  |  |  |  |  |  |  |  |  |
| 31. Low self-esteem (e.g., negative self-perception, does not like their body, does not feel lovable, etc.). | | | | | | | | |  |  |  |  |  |
|  | YES |  | NO |  |
|  |  |  |  |  |  |  |  |  |  |  |  |  |  |
| 32. Attributes to self the responsibility for traumatic events (e.g., self-hatred, feeling guilty about the events, shame, etc.). | | | | | | | | |  |  |  |  |  |
|  | YES |  | NO |  |
|  |  |  |  |  |  |  |  |  |  |  |  |  |  |
| 33. Feeling of worthlessness or excessive or inappropriate guilt (which can be delusional) almost every day. | | | | | | | | |  |  |  |  |  |
|  | YES |  | NO |  |
|  |  |  |  |  |  |  |  |  |  |  |  |  |  |
| 34. Alteration of identity: intense and persistent instability of self-image and sense of self. | | | | | | | | |  |  |  |  |  |
|  | YES |  | NO |  |
|  |  |  |  |  |  |  |  |  |  |  |  |  |  |
| 35. Chronic feeling of emptiness. | | | | | | | | |  |  |  |  |  |
|  |  |  |  |  |  |  |  |  |  | YES |  | NO |  |
| **Psychosexual domain:** | | |  |  |  |  |  |  |  |  |  |  |  |
|  |  |  |  |  |  |  |  |  |  |  |  |  |  |
| 36. Emergence of sexual behaviours that are not typical of chronological age. | | | | | | | | |  | YES |  | NO |  |
|  |  |  |  |  |  |  |  |  |  |  |  |  |  |
| 37. Occurrence of inappropriate sexual behaviours for any age (e.g., investigating animal genitalia and attempting to insert objects, etc.) | | | | | | | | |  |  |  |  |  |
|  | YES |  | NO |  |
|  |  |  |  |  |  |  |  |  |  |  |  |  |  |
| 38. Forces other children/adolescents to engage in sexual activities. | | | | | | | | |  | YES |  | NO |  |
|  |  |  |  |  |  |  |  |  |  |  |  |  |  |
| 39. Repeated attempts to insert objects into vaginal or anal orifices of own body or other children/adolescent's body. | | | | | | | | |  |  |  |  |  |
|  | YES |  | NO |  |
|  |  |  |  |  |  |  |  |  |  |  |  |  |  |
| 40. Abusive or inappropriate physical approaches (inadequate time or place). | | | | | | | | |  |  |  |  |  |
|  | YES |  | NO |  |
|  |  |  |  |  |  |  |  |  |  |  |  |  |  |
| **Health domain** | |  |  |  |  |  |  |  |  |  |  |  |  |
|  |  |  |  |  |  |  |  |  |  |  |  |  |  |
| 41. Possible somatization (e.g. frequent headaches, recurrent abdominal pain not associated with other symptoms, nonspecific pain in the trunk and extremities without obvious cause, etc.). | | | | | | | | |  |  |  |  |  |
|  | YES |  | NO |  |
|  |  |  |  |  |
|  |  |  |  |  |  |  |  |  |  |  |  |  |  |
| 42. Recurrent infections (e.g., respiratory diseases, diarrhoea, urinary infections, etc.). | | | | | | | | |  | YES |  | NO |  |
|  |  |  |  |  |
|  |  |  |  |  |  |  |  |  |  |  |  |  |  |
| 43. Manifestations of allergy (e.g., allergic rhinitis, asthma, atopic dermatitis, etc.). | | | | | | | | |  | YES |  | NO |  |
|  |  |  |  |  |  |  |  |  |  |  |  |  |  |
| **C. Functional impairment** | | | | | | | | | | | | |  |
| Which of the following areas of (child/adolescent name)'s daily life have been affected? | | | | | | | | | | | | |  |
|  |
|  |  |  |  |  |  |  |  |  |  |  |  |  |  |
| 44. School environment (e.g., loss of course years, expulsion from school, regular absence from class, recurring problems with authority and discipline, etc.). | | | | | | | | |  |  |  |  |  |
|  | YES |  | NO |  |
|  |  |  |  |  |
|  |  |  |  |  |  |  |  |  |  |  |  |  |  |
| 45. Family (e.g., difficulty relating to parents, siblings, relatives; forced separation, loss of custody, etc.). | | | | | | | | |  | YES |  | NO |  |
|  |  |  |  |  |
|  |  |  |  |  |  |  |  |  |  |  |  |  |  |
| 46. Peers (e.g., transgression of boundaries with peers, constant fights, social isolation, etc.). | | | | | | | | |  | YES |  | NO |  |
|  |  |  |  |  |
|  |  |  |  |  |  |  |  |  |  |  |  |  |  |
| 47. Legal (e.g., institutionalization of the child, loss of parental custody, adoption, problems with the law, etc.). | | | | | | | | |  | YES |  | NO |  |
|  |  |  |  |  |
|  |  |  |  |  |  |  |  |  |  |  |  |  |  |
|  |  |  |  |  |  |  |  |  |  |  |  |  |  |
